# Supplementary material for: Cyclin B2 impairs the p53 signaling in nasopharyngeal carcinoma
Source: Springer Nature journal article supplement (doi:10.1186/s12885-023-11768-4), 2024-01-02

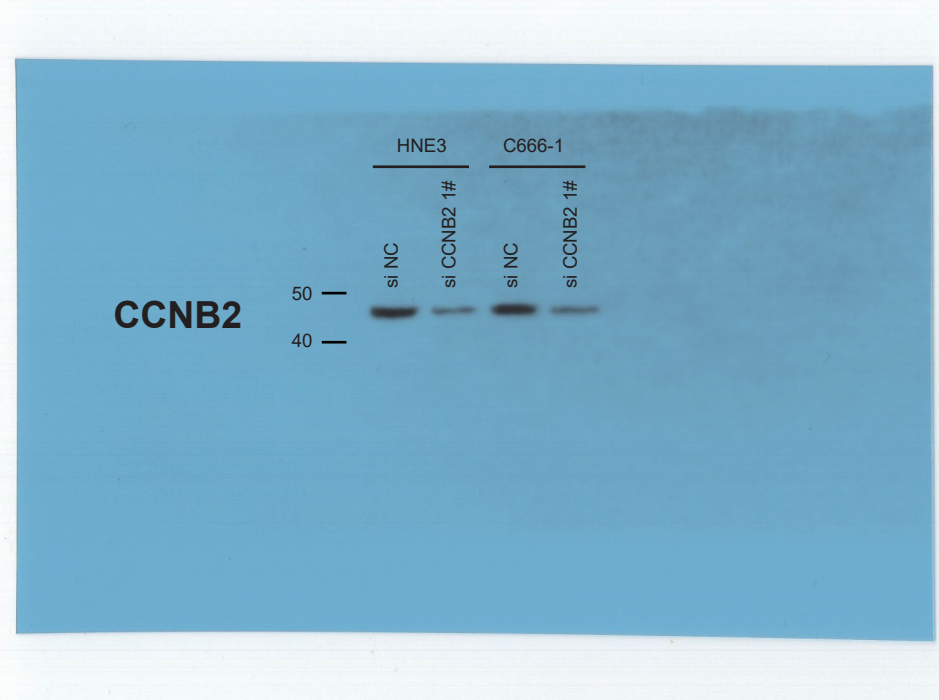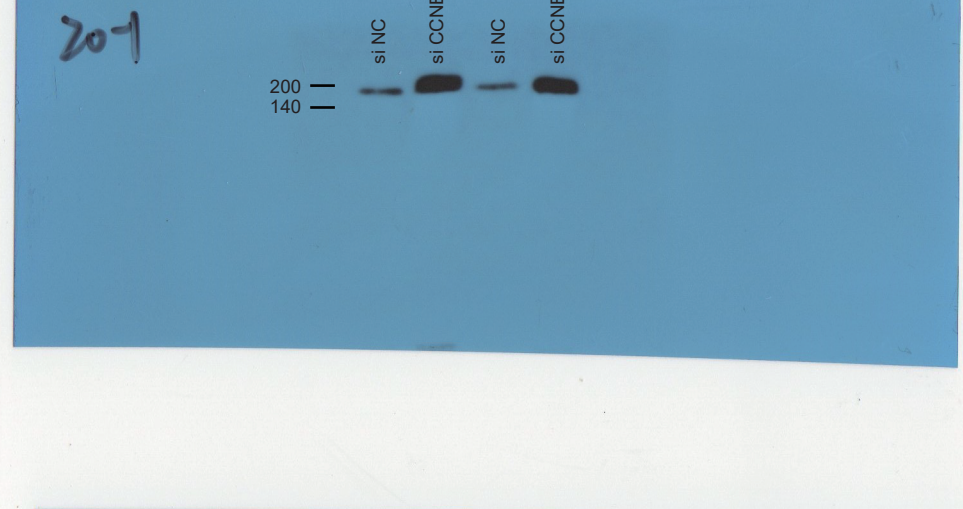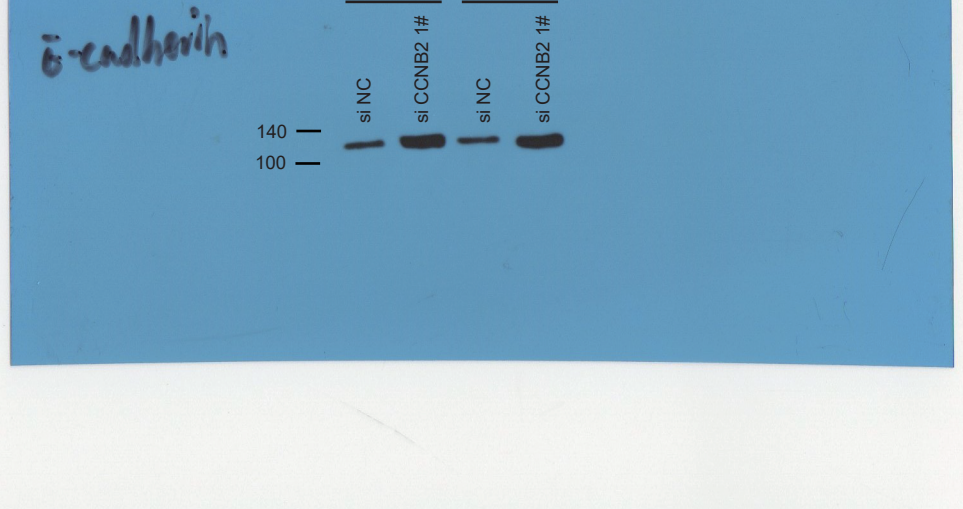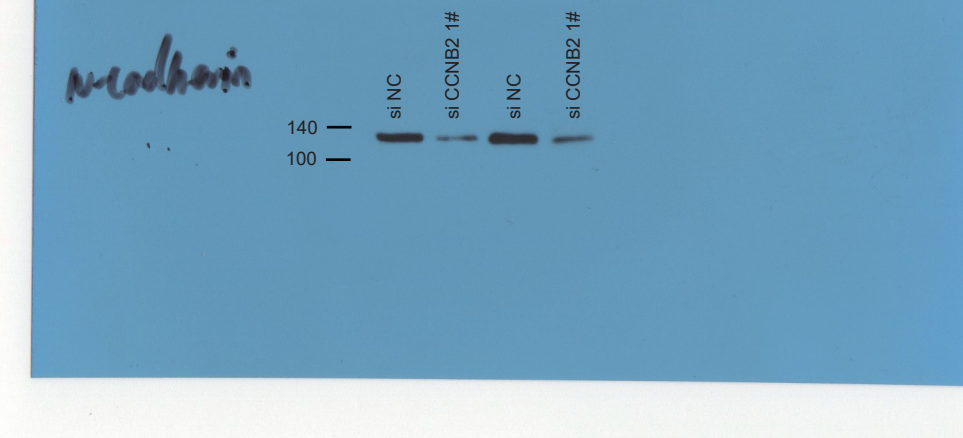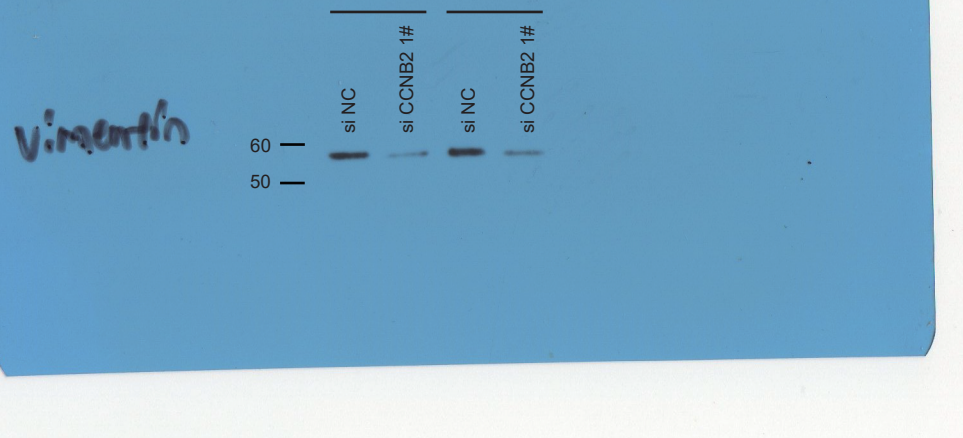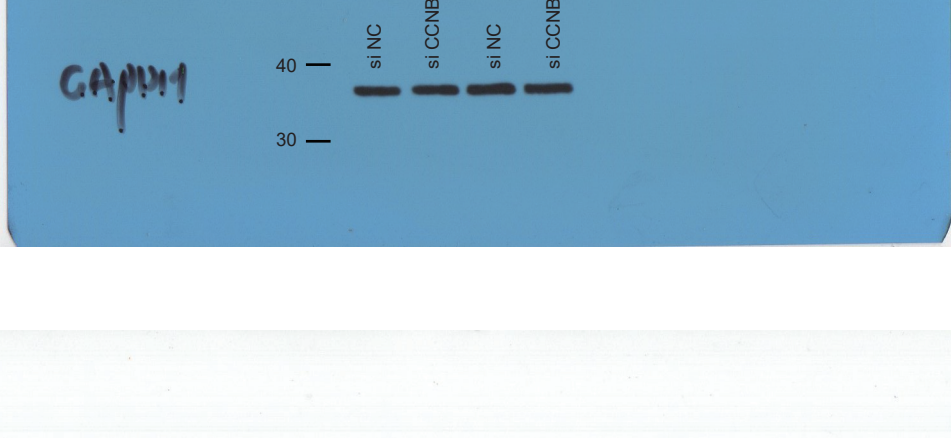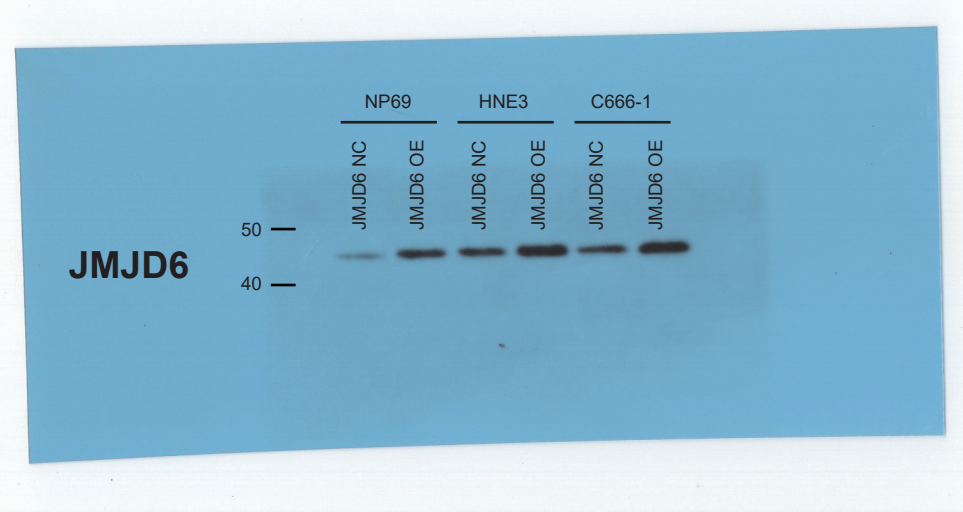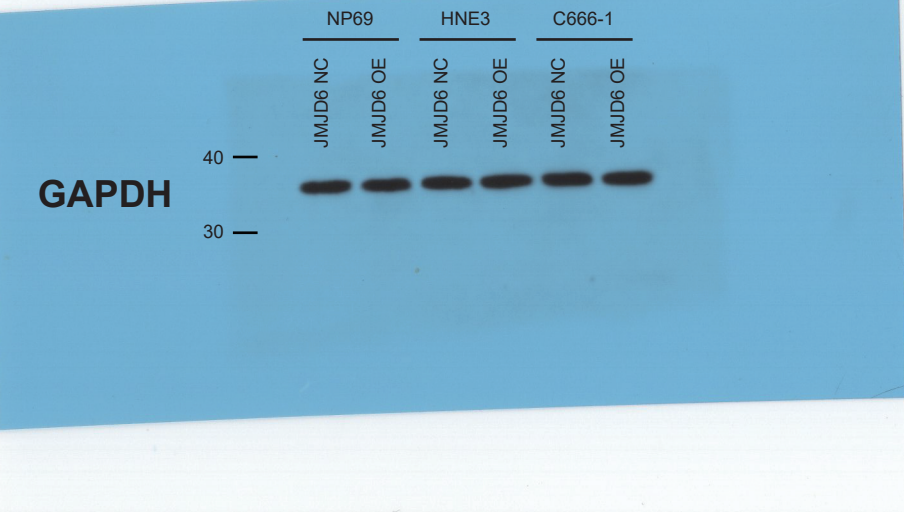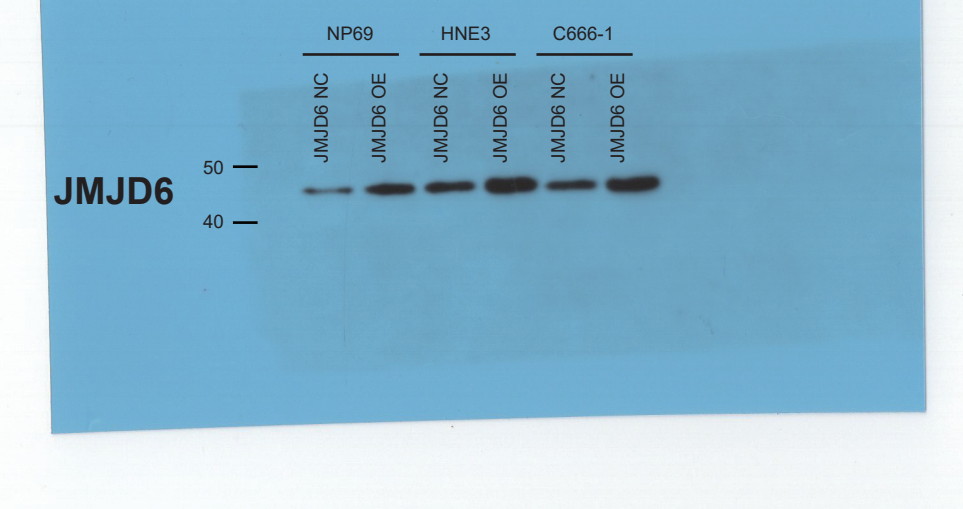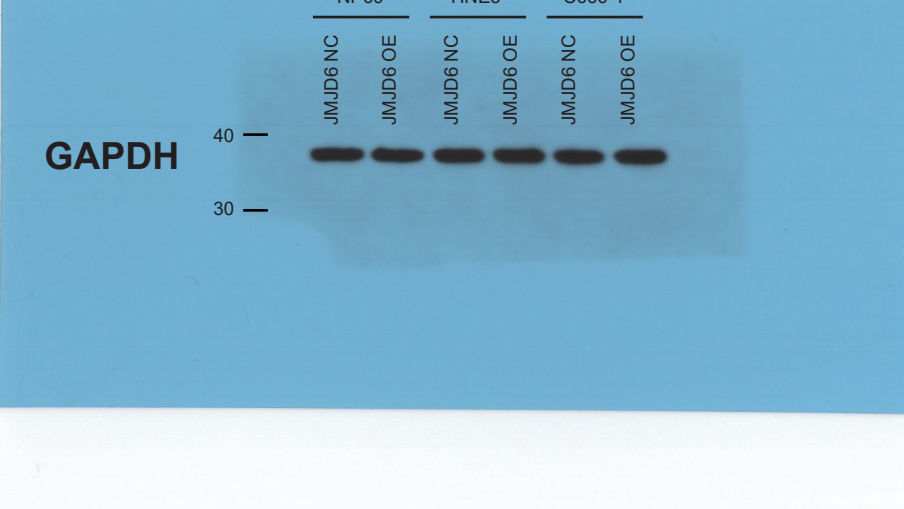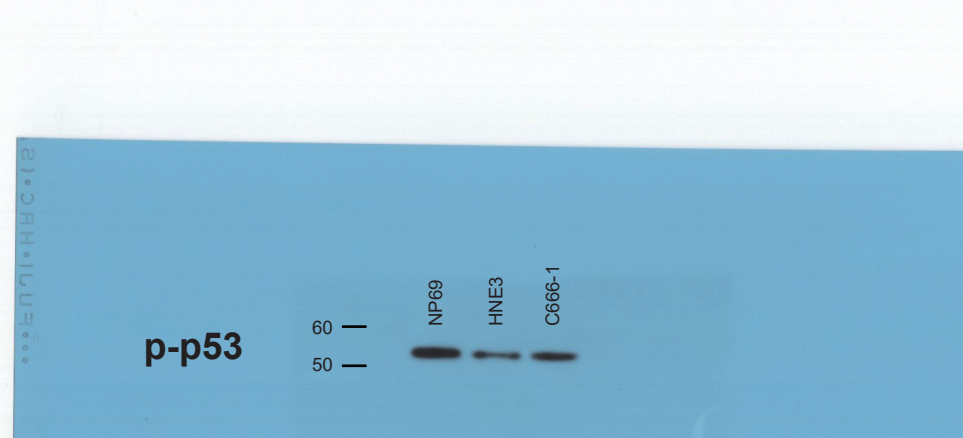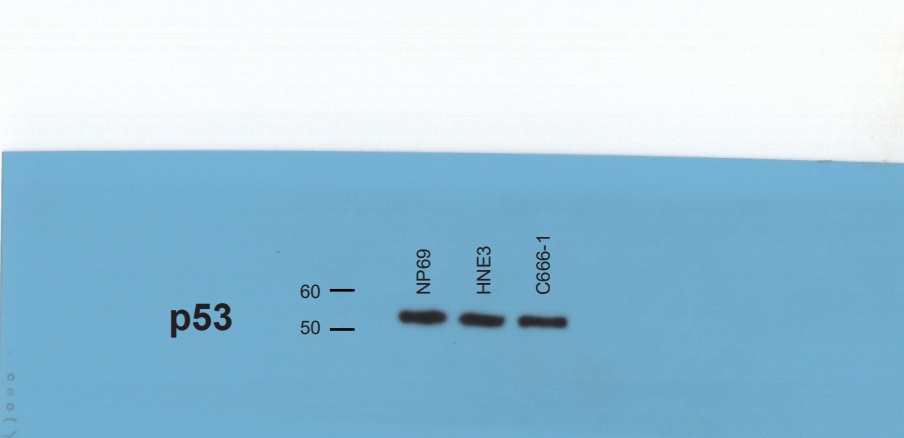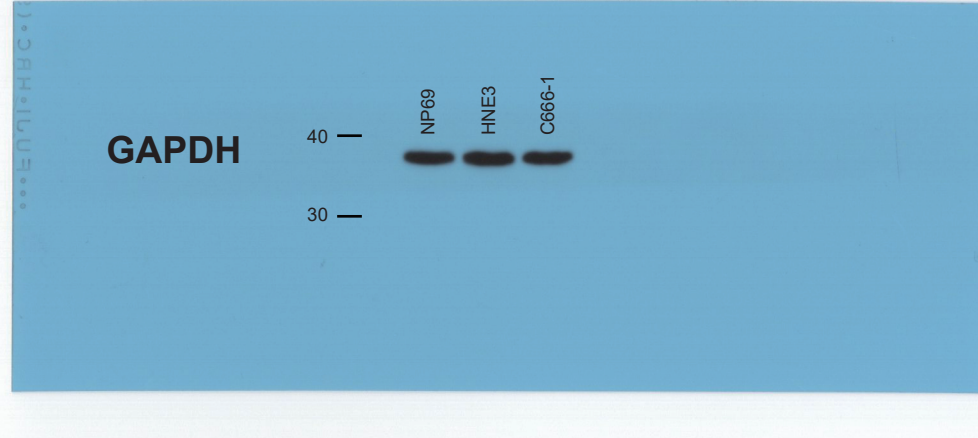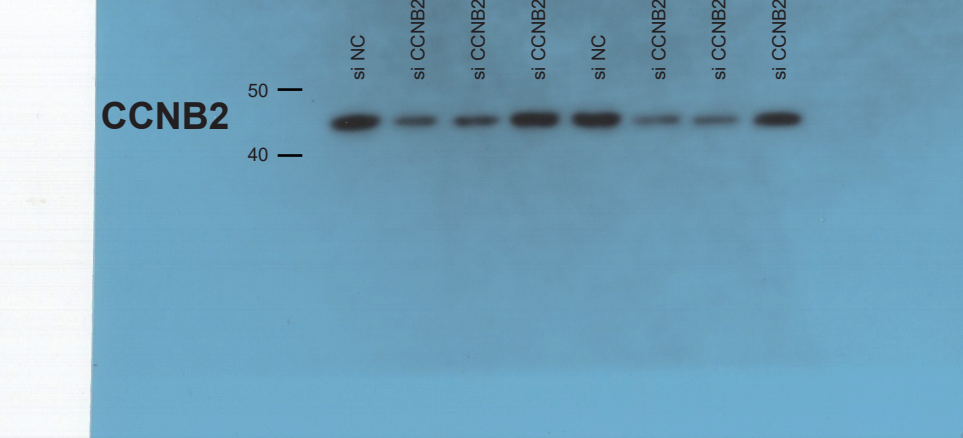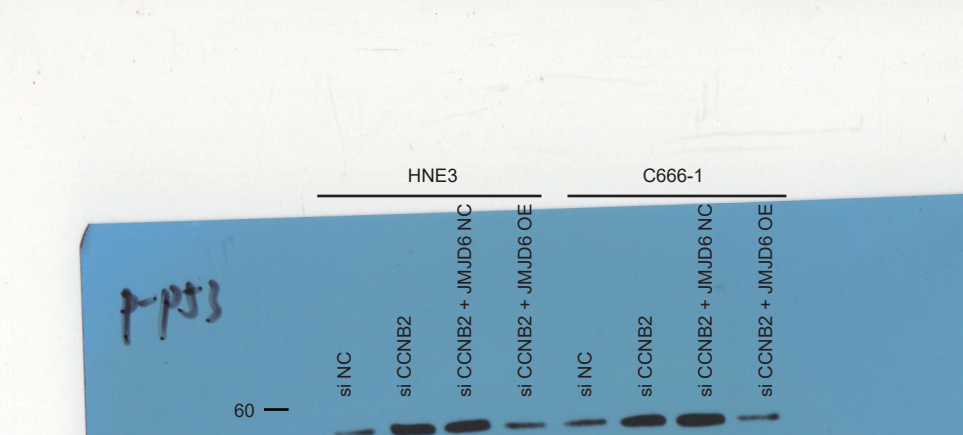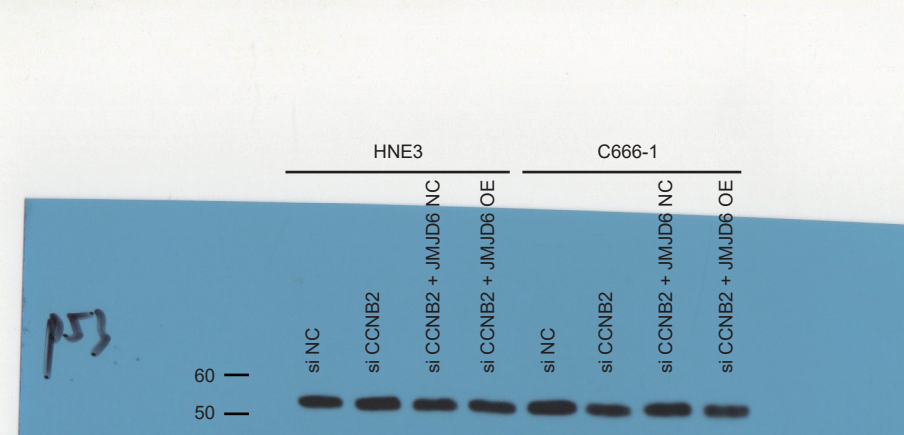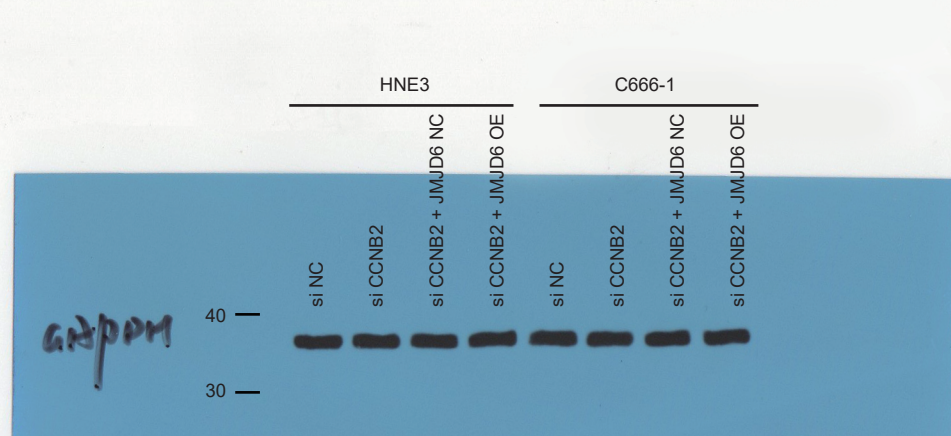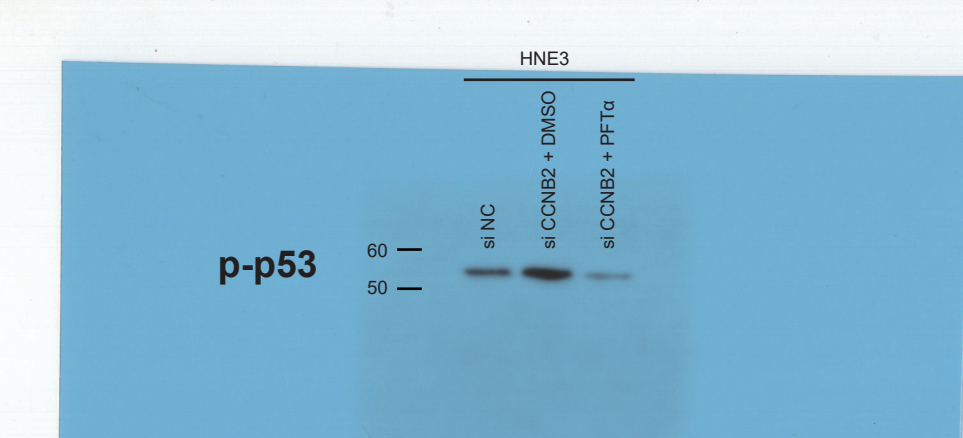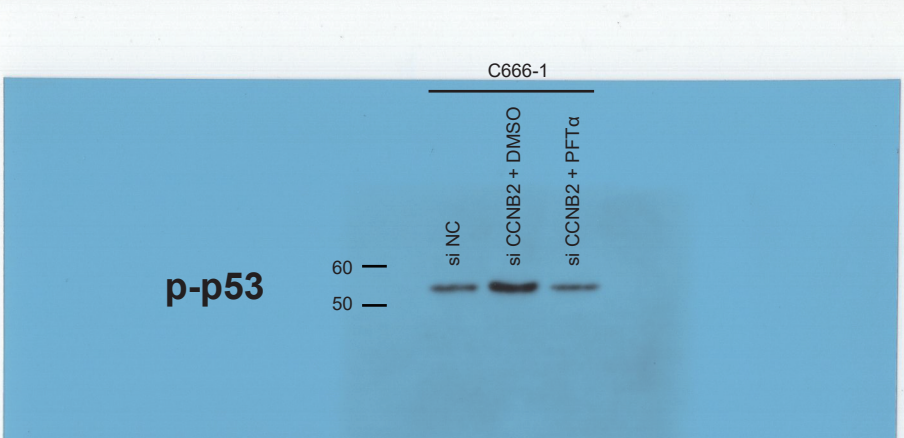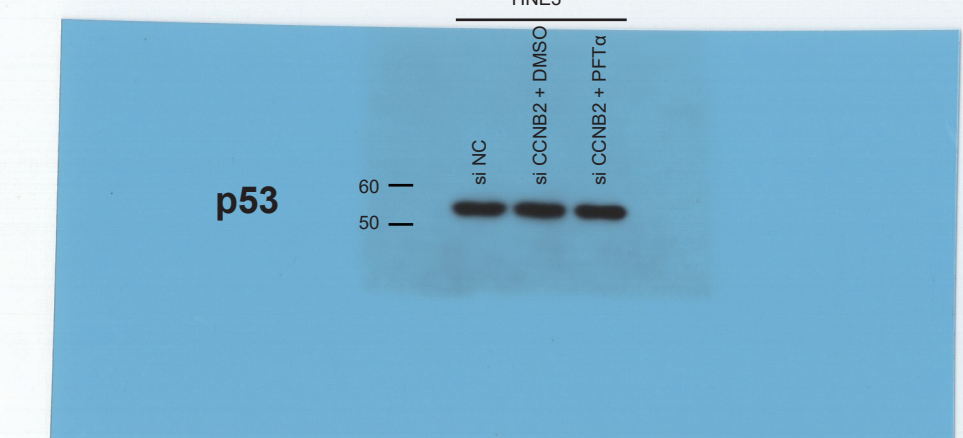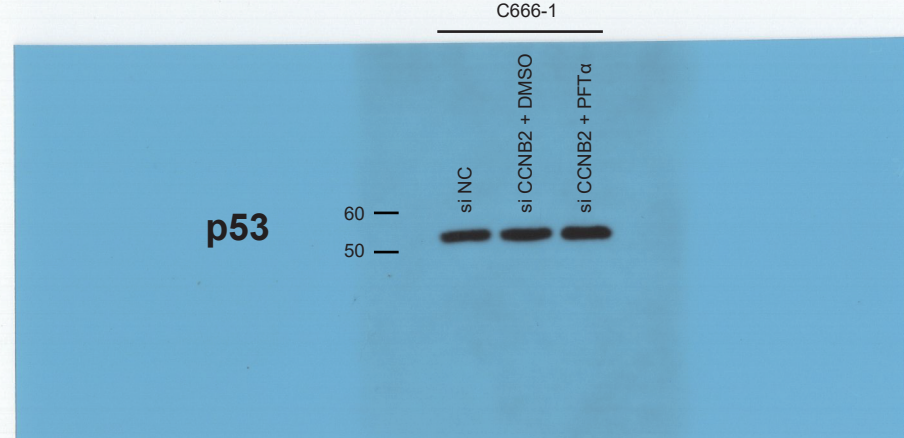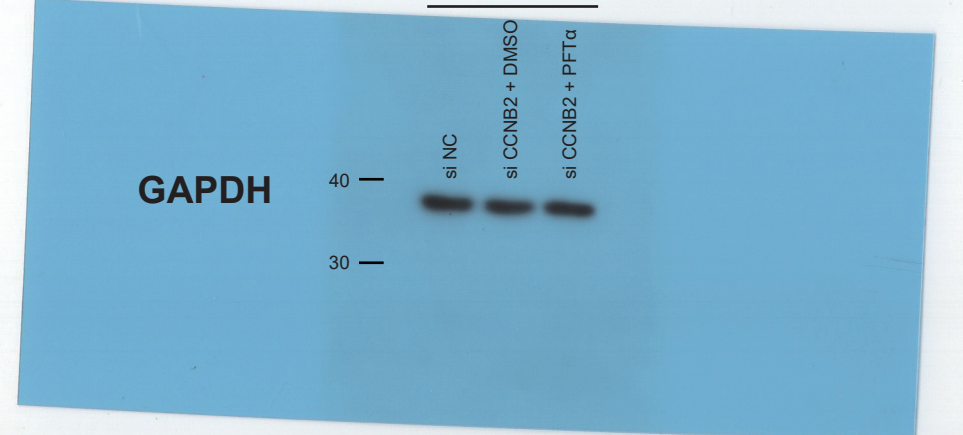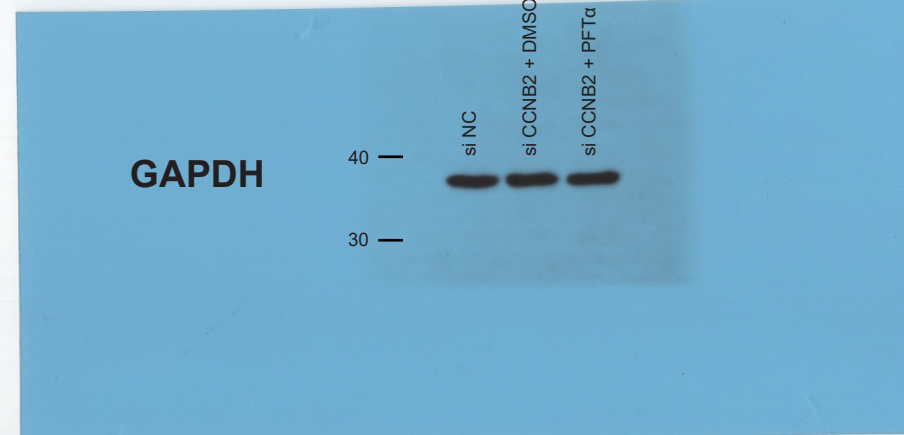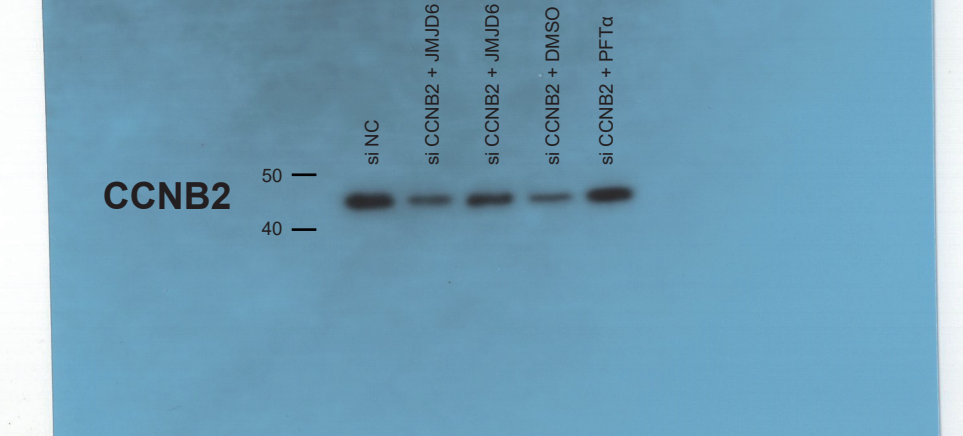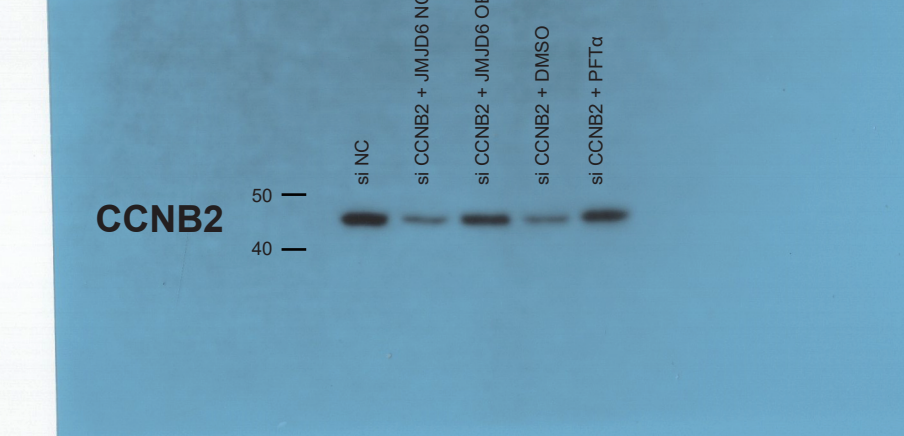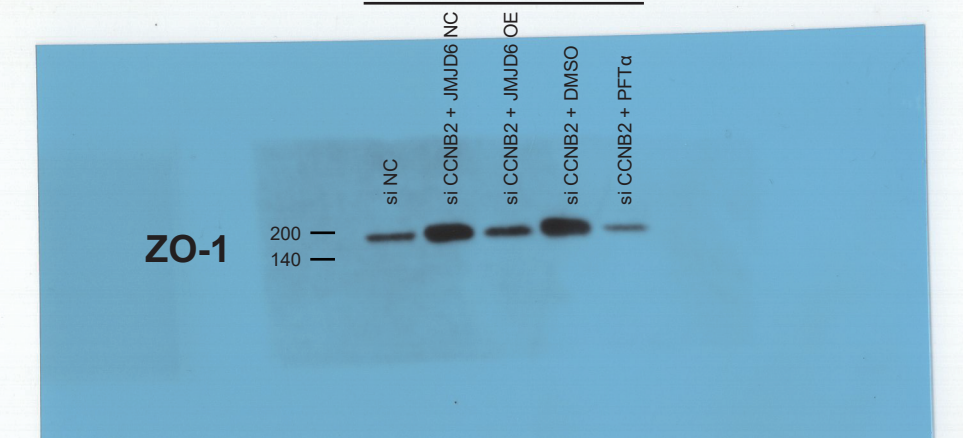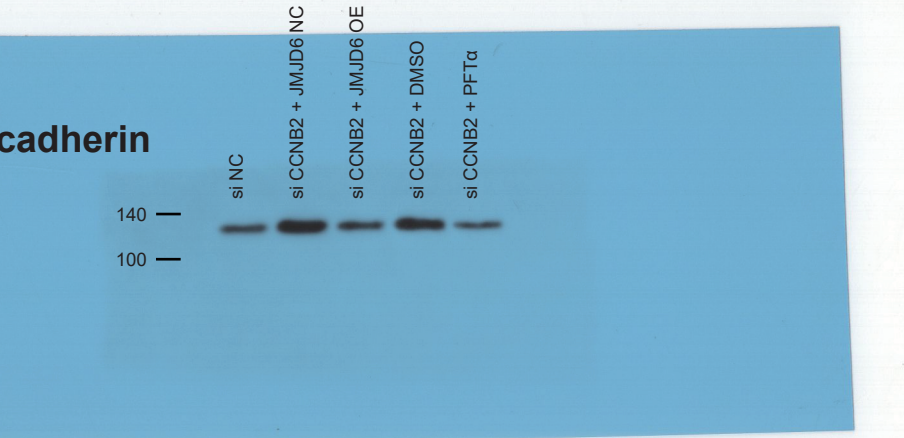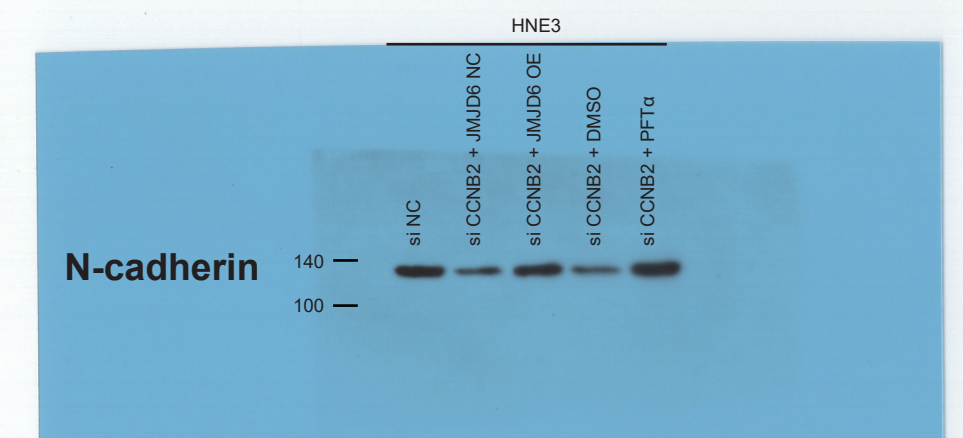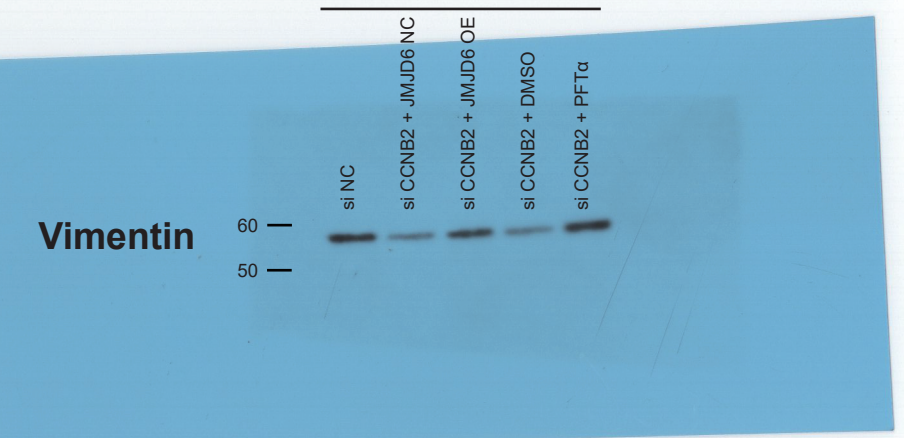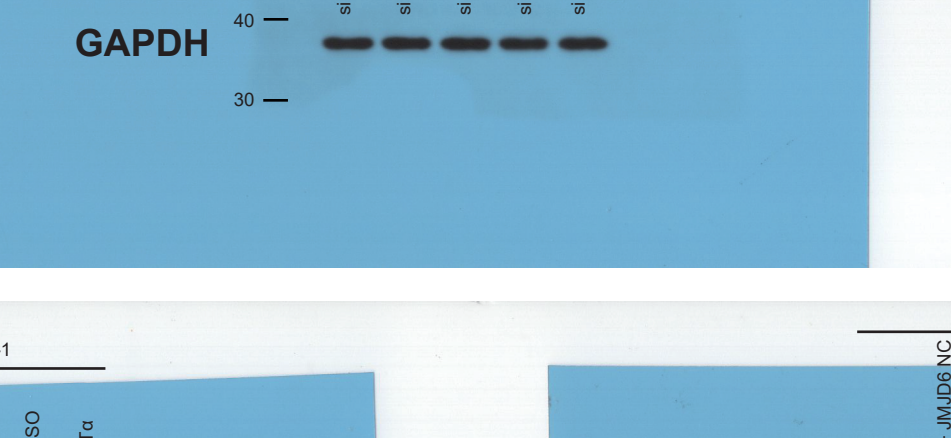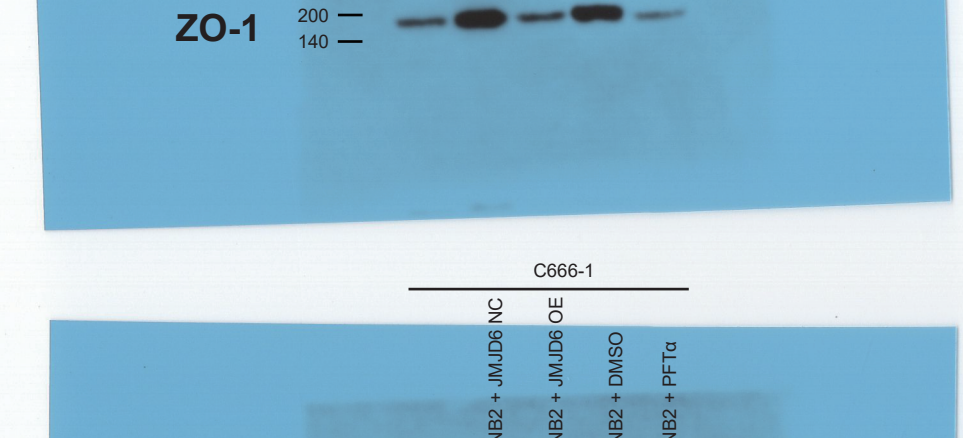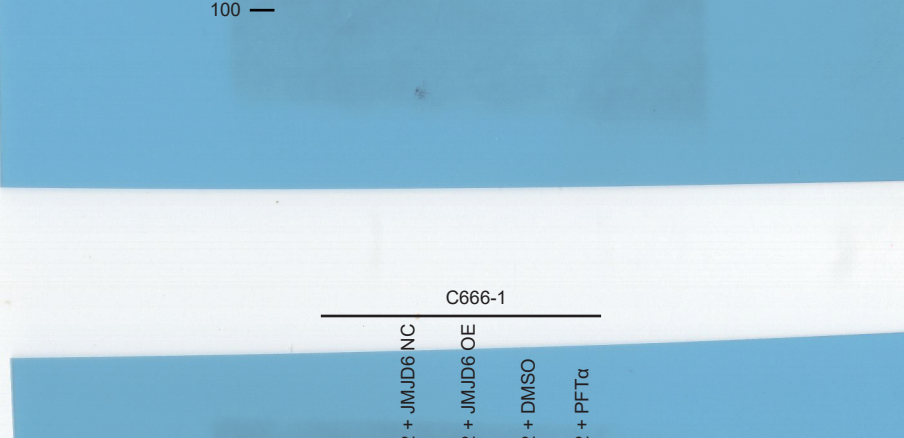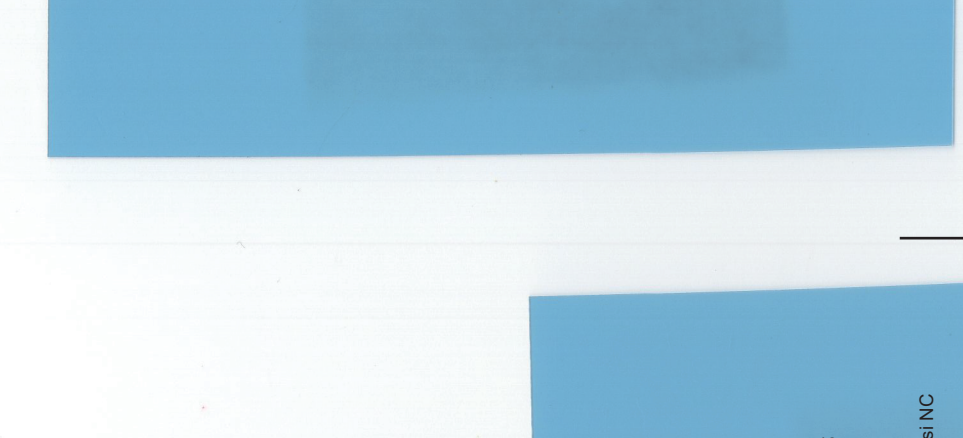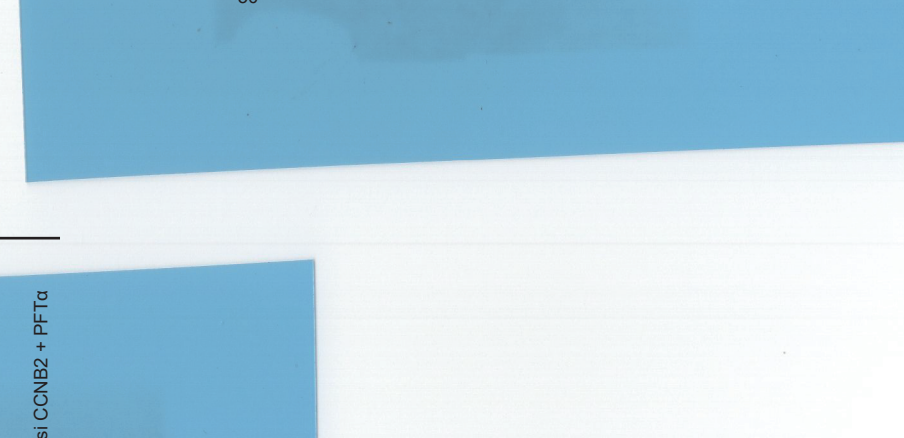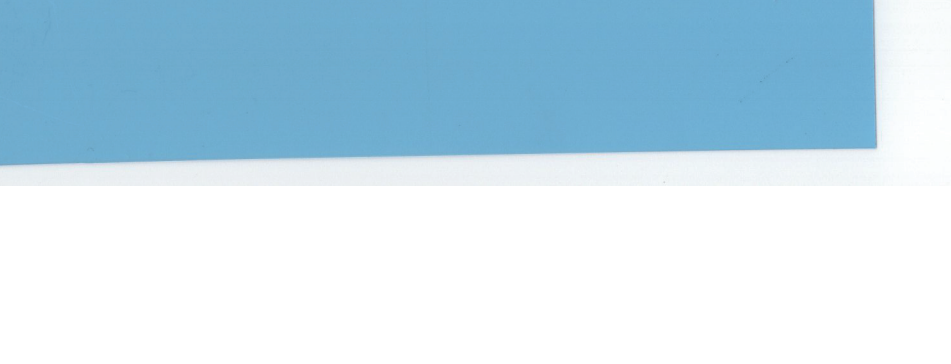

Supplement: MOESM3 [file 26582980]
